# Supplementary material for: Liver-specific deletion of the Plpp3 gene alters plasma lipid composition and worsens atherosclerosis in apoE−/− mice
Source: PubMed Central journal article supplement (PMC5349609; doi:10.1038/srep44503), 2017-03-14
Supplement: srep44503-s1.pdf [file srep44503-s1.pdf]

# Liver-specific deletion of the *Plpp3* gene alters plasma lipid composition and worsens atherosclerosis in apoE<sup>-/-</sup> mice

Marco Busnelli<sup>1^</sup>, Stefano Manzini<sup>1^</sup>, Mika Hilvo<sup>2</sup>, Cinzia Parolini<sup>1</sup>, Giulia S. Ganzetti<sup>1</sup>, Federica Dellera<sup>1</sup>, Kim Ekroos<sup>2</sup>, Minna Jänis<sup>3</sup>, Diana Escalante-Alcalde<sup>4</sup>, Cesare R. Sirtori<sup>1</sup>, Reijo Laaksonen<sup>2</sup>, Giulia Chiesa<sup>1\*</sup>

<sup>1</sup>Department of Pharmacological and Biomolecular Sciences, Università degli Studi di Milano, Milano, Italy; <sup>2</sup>Zora Biosciences Oy, Espoo, Finland; <sup>3</sup>Department of Physiology, Institute of Biomedicine, University of Turku, Turku, Finland; <sup>4</sup>Instituto de Fisiología Celular, División de Neurociencias Universidad Nacional Autónoma de México, Cd. Mx. 04510, México.

<sup>^</sup> The Authors contributed equally to this work.

\*Corresponding author. Giulia Chiesa, PhD, Department of Pharmacological and Biomolecular Sciences, via Balzaretti, 9, 20133 Milan, Italy; phone: +39-02-50318328, fax: +39-02-50318284; email: [giulia.chiesa@unimi.it](mailto:giulia.chiesa@unimi.it)

## Supplementary Figure 1

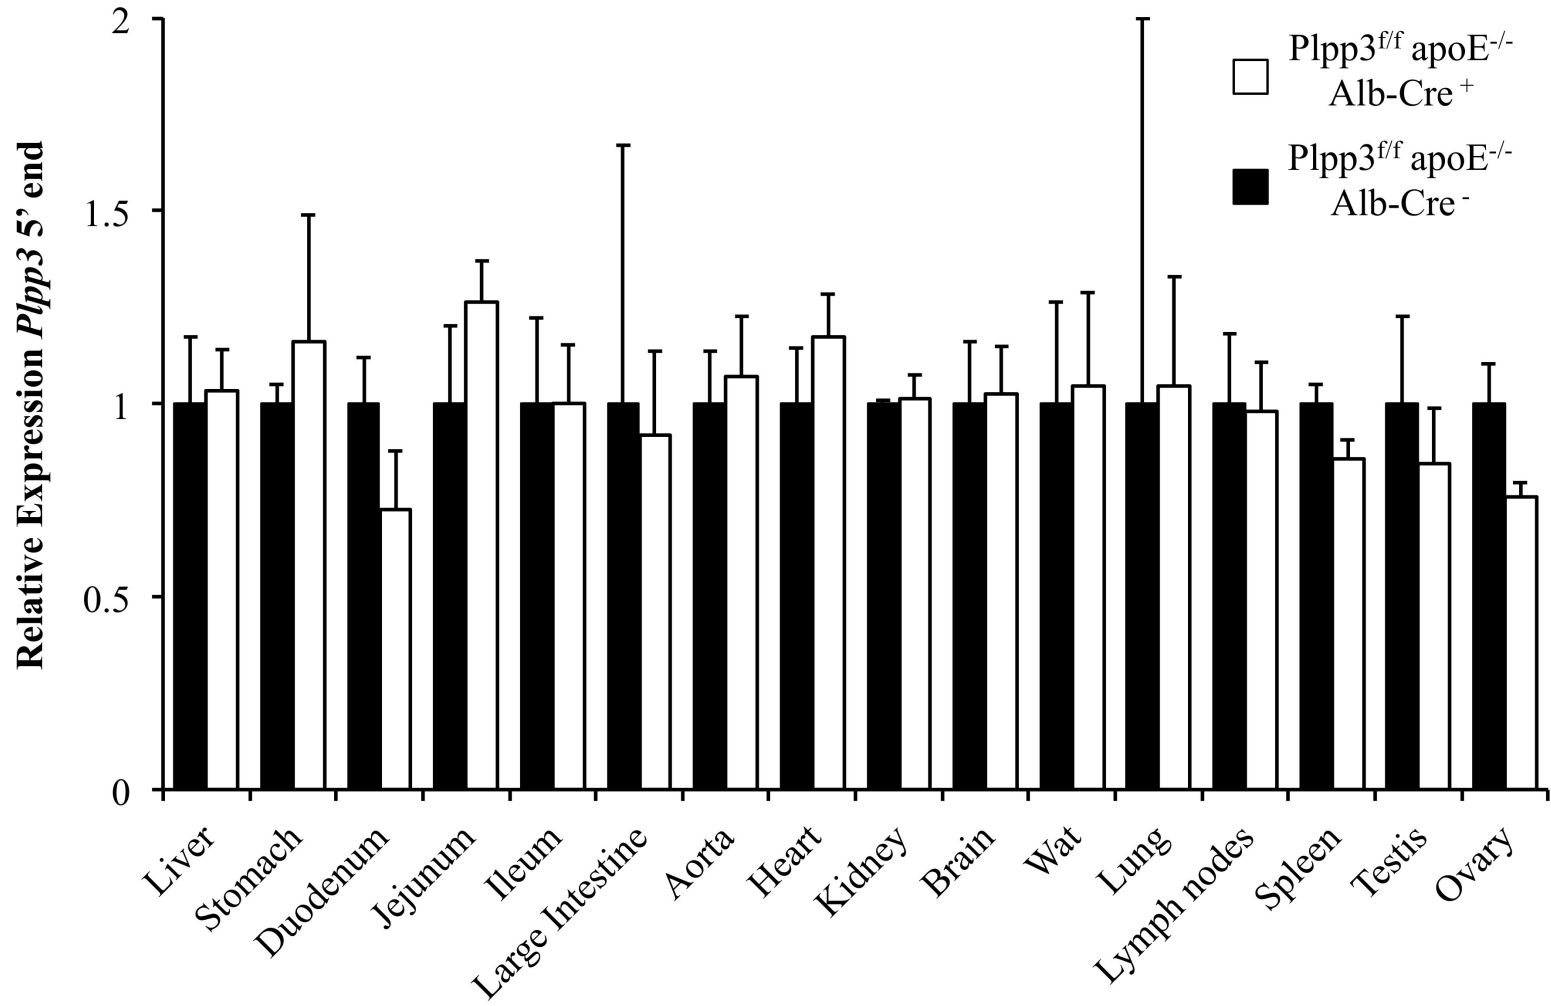

**Supplementary Figure 1. Quantitative expression of the *Plpp3* mRNA 5' end.** Expression levels of *Plpp3* mRNA are shown, quantified by qPCR targeting the region upstream of the Cre recombinase-mediated floxed exons excision site. Values were normalized to the expression of the transcript in each of the tissues from *Plpp3*<sup>f/f</sup> apoE<sup>-/-</sup> Alb-Cre<sup>-</sup> mice. (n=6 for liver, n=3 for all the other tissues, p>0.05 by Wilcoxon rank-sum test). Wat = white adipose tissue.

## Supplementary Figure 2

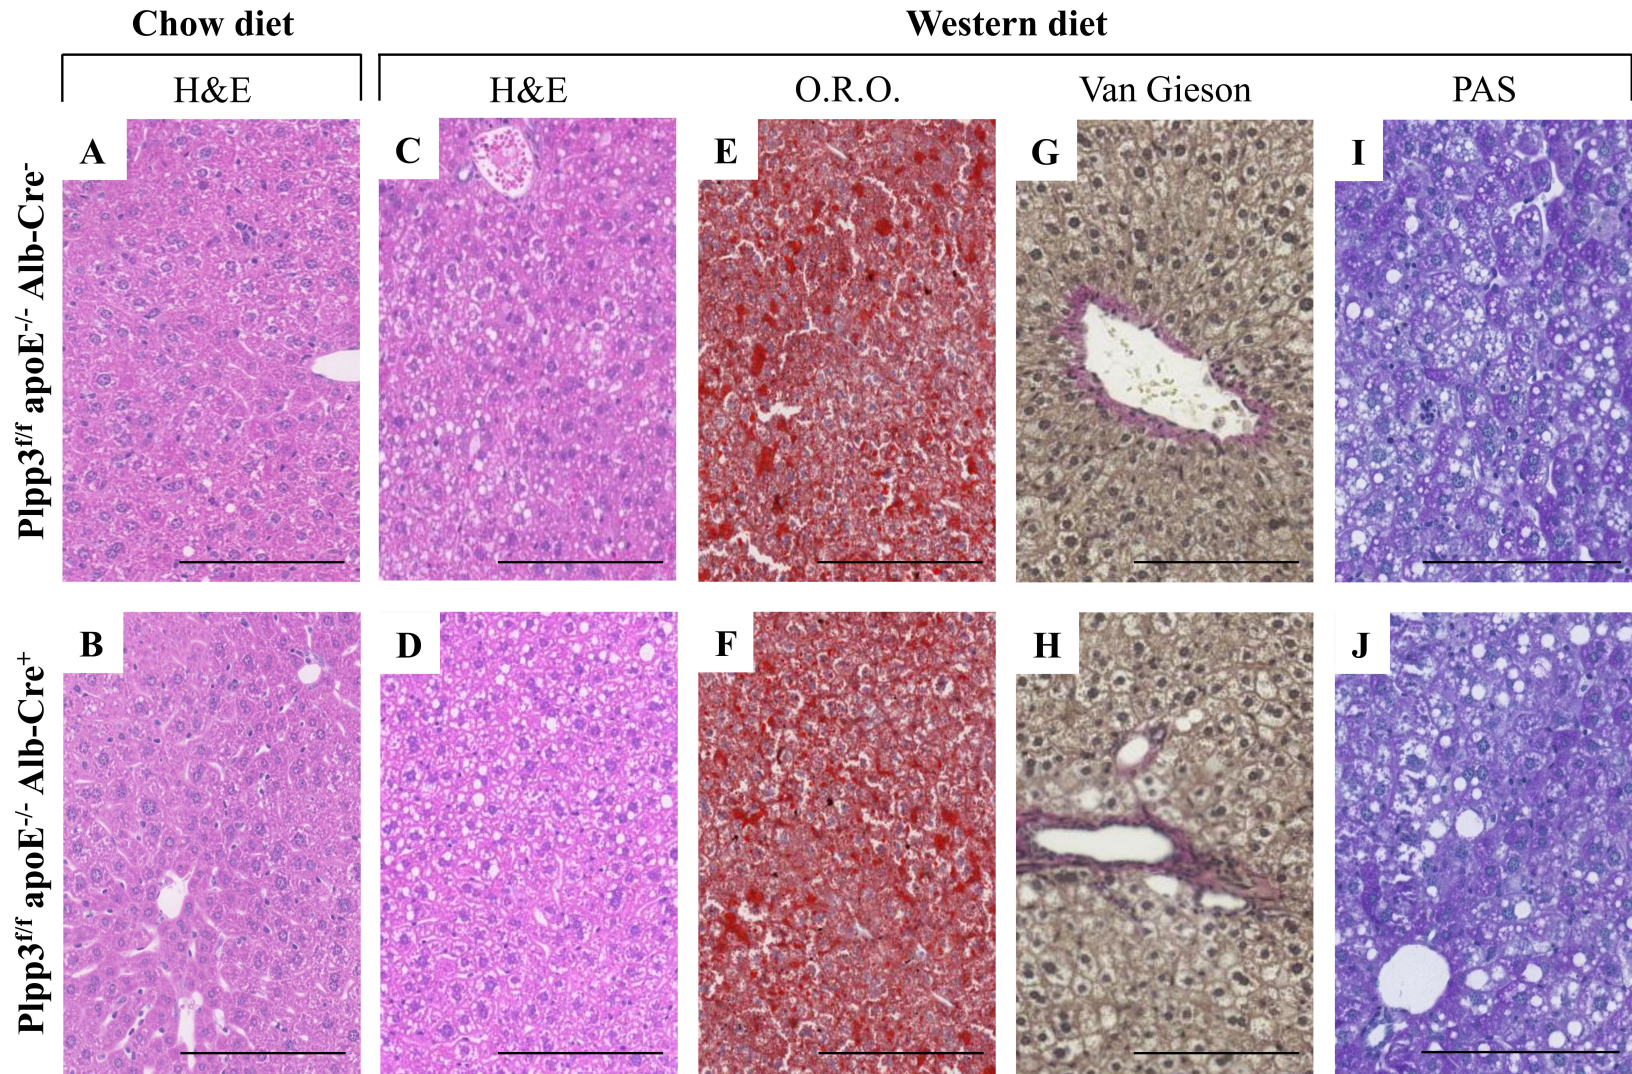

**Supplementary Figure 2. Liver histology of chow and Western-diet fed mice.** Representative photomicrographs of H&E staining of chow-fed *Plpp3<sup>ff</sup> apoE<sup>-/-</sup> Alb-Cre<sup>-</sup>* and *Plpp3<sup>ff</sup> apoE<sup>-/-</sup> Alb-Cre<sup>+</sup>* mice (A, B). H&E (C, D), Oil Red O (E, F), Van Gieson, (G, H) and PAS (I, J) staining of liver sections from Western-fed *Plpp3<sup>ff</sup> apoE<sup>-/-</sup> Alb-Cre<sup>-</sup>* and *Plpp3<sup>ff</sup> apoE<sup>-/-</sup> Alb-Cre<sup>+</sup>* mice. Bar length = 200  $\mu$ m.

# Supplementary Figure 3

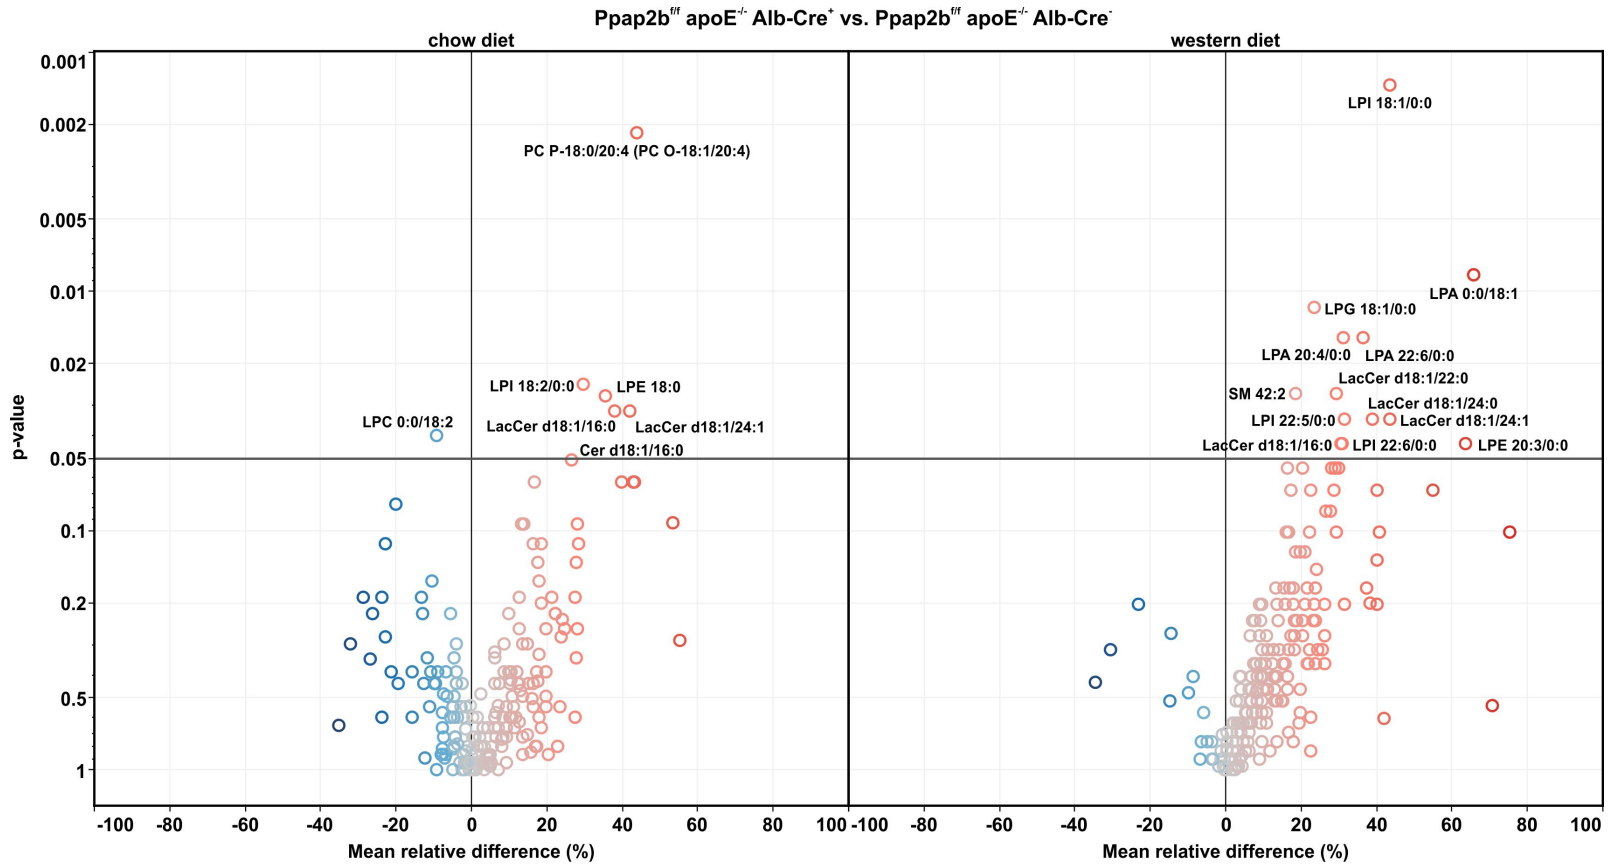

**Supplementary Figure 3. Volcano plot highlighting the most significant changes in the levels of plasma lipids caused by hepatic *Ppp3* deletion in mice fed a chow or Western diet.** Data are expressed as the percentage of the mean relative difference; n=8-10, Wilcoxon rank-sum test. In the figures, the red colour refers to increased concentrations and the blue colour refers to decreased concentrations in *Ppp3<sup>f/f</sup> apoE<sup>-/-</sup> Alb-Cre<sup>+</sup>* vs *Ppp3<sup>f/f</sup> apoE<sup>-/-</sup> Alb-Cre<sup>-</sup>* mice. Cer d18:1 = Ceramide d18:1; LacCer = Lactosylceramide; LPA = Lysophosphatidic acid; LPC = Lysophosphatidylcholine; LPE = Lysophosphatidylethanolamine; LPG = Lysophosphatidylglycerol; LPI = Lysophosphatidylinositol; PC O = Phosphatidylcholine; SM = Sphingomyelin.

**Supplementary Table 1. Effects of diet on plasma lipid classes in Plpp3<sup>f/f</sup> apoE<sup>-/-</sup> Alb-Cre<sup>-</sup> and Plpp3<sup>f/f</sup> apoE<sup>-/-</sup> Alb-Cre<sup>+</sup> mice.**

| Total lipids | Plpp3 <sup>f/f</sup> apoE <sup>-/-</sup> Alb-Cre <sup>-</sup> |                 |                              |                | Plpp3 <sup>f/f</sup> apoE <sup>-/-</sup> Alb-Cre <sup>+</sup> |                 |                              |                |
|--------------|---------------------------------------------------------------|-----------------|------------------------------|----------------|---------------------------------------------------------------|-----------------|------------------------------|----------------|
|              | Mean ± SEM (μmol/L)                                           |                 | Mean relative difference (%) | P-value        | Mean ± SEM (μmol/L)                                           |                 | Mean relative difference (%) | P-value        |
|              | Western diet                                                  | Chow diet       |                              |                | Western diet                                                  | Chow diet       |                              |                |
| CE           | 28131 ± 2238                                                  | 509 ± 8156      | <b>245%</b>                  | <b>8.2E-05</b> | 32812 ± 2757                                                  | 8491 ± 486      | <b>286%</b>                  | <b>2.2E-05</b> |
| Cer d18:0    | 1.8 ± 0.1                                                     | 0.02 ± 0.33     | <b>462%</b>                  | <b>8.2E-05</b> | 2.2 ± 0.2                                                     | 0.34 ± 0.02     | <b>541%</b>                  | <b>2.2E-05</b> |
| Cer d18:1    | 50.2 ± 6.9                                                    | 1.4 ± 11.8      | <b>327%</b>                  | <b>8.2E-05</b> | 50.1 ± 3                                                      | 9.9 ± 1.1       | <b>407%</b>                  | <b>2.2E-05</b> |
| DAG          | 22.4 ± 2.1                                                    | 0.5 ± 5.9       | <b>280%</b>                  | <b>3.1E-04</b> | 22.4 ± 1.2                                                    | 5.7 ± 0.4       | <b>293%</b>                  | <b>4.6E-05</b> |
| Gb3          | 3.8 ± 0.3                                                     | 0.1 ± 1.1       | <b>240%</b>                  | <b>8.2E-05</b> | 4.6 ± 0.2                                                     | 1.3 ± 0.1       | <b>269%</b>                  | <b>2.2E-05</b> |
| Glc/GalCer   | 113.9 ± 4.8                                                   | 2.2 ± 28.3      | <b>303%</b>                  | <b>8.2E-05</b> | 125.3 ± 5.8                                                   | 28.4 ± 2.3      | <b>341%</b>                  | <b>2.2E-05</b> |
| LPA          | 0.2 ± 0.01                                                    | 0.01 ± 0.19     | n.s.                         | <b>6.7E-01</b> | 0.25 ± 0.02                                                   | 0.2 ± 0.01      | <b>28%</b>                   | <b>5.7E-03</b> |
| LPC          | 1058.9 ± 46.4                                                 | 17.9 ± 584.4    | <b>81%</b>                   | <b>8.2E-05</b> | 1113.5 ± 28.9                                                 | 582 ± 29.5      | <b>91%</b>                   | <b>2.2E-05</b> |
| LPE          | 46.9 ± 3.5                                                    | 2.0 ± 21.1      | <b>122%</b>                  | <b>5.8E-04</b> | 57.2 ± 4.7                                                    | 23 ± 2.1        | <b>148%</b>                  | <b>4.3E-05</b> |
| LPG          | 12.9 ± 3.6                                                    | 4.1 ± 12.2      | n.s.                         | <b>6.7E-01</b> | 15.8 ± 4.4                                                    | 9.5 ± 2.8       | n.s.                         | <b>4.5E-01</b> |
| LPI          | 3.1 ± 0.2                                                     | 0.1 ± 1.2       | <b>161%</b>                  | <b>8.2E-05</b> | 3.8 ± 0.2                                                     | 1.3 ± 0.1       | <b>190%</b>                  | <b>2.2E-05</b> |
| LSM          | 0.01 ± 0.001                                                  | 0.0004 ± 0.0056 | <b>119%</b>                  | <b>5.5E-03</b> | 0.01 ± 0.001                                                  | 0.0059 ± 0.0004 | <b>130%</b>                  | <b>2.2E-05</b> |
| LacCer       | 15.9 ± 1.6                                                    | 0.3 ± 3         | <b>438%</b>                  | <b>8.2E-05</b> | 21.5 ± 1.5                                                    | 4.0 ± 0.3       | <b>441%</b>                  | <b>2.2E-05</b> |
| PC           | 3573 ± 216                                                    | 105 ± 1399      | <b>155%</b>                  | <b>8.2E-05</b> | 3742 ± 160                                                    | 1328 ± 48       | <b>182%</b>                  | <b>2.2E-05</b> |
| PC O         | 56.9 ± 5.2                                                    | 1.3 ± 14.5      | <b>291%</b>                  | <b>8.2E-05</b> | 61.9 ± 2.3                                                    | 17.2 ± 1.4      | <b>260%</b>                  | <b>2.2E-05</b> |
| PE O         | 1.9 ± 0.3                                                     | 0.3 ± 2.3       | n.s.                         | <b>4.4E-01</b> | 1.4 ± 0.2                                                     | 2.3 ± 0.2       | <b>-37%</b>                  | <b>1.7E-02</b> |
| PI           | 52.2 ± 3.2                                                    | 2.3 ± 29.8      | <b>75%</b>                   | <b>1.6E-04</b> | 55.3 ± 2.5                                                    | 29 ± 2.7        | <b>91%</b>                   | <b>4.3E-05</b> |
| SM           | 981 ± 86                                                      | 25 ± 378        | <b>159%</b>                  | <b>1.6E-04</b> | 1134 ± 47                                                     | 401 ± 24        | <b>183%</b>                  | <b>2.2E-05</b> |

**Supplementary Table 1. Effects of diet on plasma lipid classes in Plpp3<sup>f/f</sup> apoE<sup>-/-</sup> Alb-Cre<sup>-</sup> and Plpp3<sup>f/f</sup> apoE<sup>-/-</sup> Alb-Cre<sup>+</sup> mice.** Data are expressed as the mean  $\pm$  SEM; n=8-10, Wilcoxon rank-sum test. CE = Cholesteryl ester; Cer d18:0 = Ceramide d18:0; Cer d18:1 = Ceramide d18:1; DAG = Diacylglycerol; Gb3 = Globotriaosylceramide; Glc/GalCer = Glucosylceramide/Galactosylceramide; LPA = Lysophosphatidic acid; LPC = Lysophosphatidylcholine; LPE = Lysophosphatidylethanolamine; LPG = Lysophosphatidylglycerol; LPI = Lysophosphatidylinositol; LSM = Lysosphingomyelin; LacCer = Lactosylceramide; PC/PC O = Phosphatidylcholine; PE O = Phosphatidylethanolamine; PI = Phosphatidylinositol; SM = Sphingomyelin.
